# Supplementary material
Source: publisher site journal article supplement (https://www.dovepress.com/article/449499)
Supplement: Supplementary file 1 [file get_supplementary_file.php]

**Table S1: PRISMA Checklist.1**

| **Section and Topic** | **Item #** | **Checklist item** | **Location where item is reported** |
| --- | --- | --- | --- |
| **TITLE** | | |  |
| Title | 1 | Identify the report as a systematic review. | 1 |
| **ABSTRACT** | | |  |
| Abstract | 2 | See the PRISMA 2020 for Abstracts checklist. | 1-2 |
| **INTRODUCTION** | | |  |
| Rationale | 3 | Describe the rationale for the review in the context of existing knowledge. | 2-3 |
| Objectives | 4 | Provide an explicit statement of the objective(s) or question(s) the review addresses. | 2-3 |
| **METHODS** | | |  |
| Eligibility criteria | 5 | Specify the inclusion and exclusion criteria for the review and how studies were grouped for the syntheses. | 3-4 |
| Information sources | 6 | Specify all databases, registers, websites, organisations, reference lists and other sources searched or consulted to identify studies. Specify the date when each source was last searched or consulted. | 3-4 |
| Search strategy | 7 | Present the full search strategies for all databases, registers and websites, including any filters and limits used. | 3-4 |
| Selection process | 8 | Specify the methods used to decide whether a study met the inclusion criteria of the review, including how many reviewers screened each record and each report retrieved, whether they worked independently, and if applicable, details of automation tools used in the process. | 4-5 |
| Data collection process | 9 | Specify the methods used to collect data from reports, including how many reviewers collected data from each report, whether they worked independently, any processes for obtaining or confirming data from study investigators, and if applicable, details of automation tools used in the process. | 4-5 |
| Data items | 10a | List and define all outcomes for which data were sought. Specify whether all results that were compatible with each outcome domain in each study were sought (e.g. for all measures, time points, analyses), and if not, the methods used to decide which results to collect. | 4-5 |
| 10b | List and define all other variables for which data were sought (e.g. participant and intervention characteristics, funding sources). Describe any assumptions made about any missing or unclear information. | 4-5 |
| Study risk of bias assessment | 11 | Specify the methods used to assess risk of bias in the included studies, including details of the tool(s) used, how many reviewers assessed each study and whether they worked independently, and if applicable, details of automation tools used in the process. | 5 |
| Effect measures | 12 | Specify for each outcome the effect measure(s) (e.g. risk ratio, mean difference) used in the synthesis or presentation of results. | 5-6 |
| Synthesis methods | 13a | Describe the processes used to decide which studies were eligible for each synthesis (e.g. tabulating the study intervention characteristics and comparing against the planned groups for each synthesis (item #5)). | 5-6 |
| 13b | Describe any methods required to prepare the data for presentation or synthesis, such as handling of missing summary statistics, or data conversions. | 5-6 |
| 13c | Describe any methods used to tabulate or visually display results of individual studies and syntheses. | 5-6 |
| 13d | Describe any methods used to synthesize results and provide a rationale for the choice(s). If meta-analysis was performed, describe the model(s), method(s) to identify the presence and extent of statistical heterogeneity, and software package(s) used. | 5-6 |
| 13e | Describe any methods used to explore possible causes of heterogeneity among study results (e.g. subgroup analysis, meta-regression). | 5-6 |
| 13f | Describe any sensitivity analyses conducted to assess robustness of the synthesized results. | 5-6 |
| Reporting bias assessment | 14 | Describe any methods used to assess risk of bias due to missing results in a synthesis (arising from reporting biases). | 5-6 |
| Certainty assessment | 15 | Describe any methods used to assess certainty (or confidence) in the body of evidence for an outcome. | 5-6 |
| **RESULTS** | | |  |
| Study selection | 16a | Describe the results of the search and selection process, from the number of records identified in the search to the number of studies included in the review, ideally using a flow diagram. | 6 |
| 16b | Cite studies that might appear to meet the inclusion criteria, but which were excluded, and explain why they were excluded. | 6 |
| Study characteristics | 17 | Cite each included study and present its characteristics. | 6-7 |
| Risk of bias in studies | 18 | Present assessments of risk of bias for each included study. | 8 |
| Results of individual studies | 19 | For all outcomes, present, for each study: (a) summary statistics for each group (where appropriate) and (b) an effect estimate and its precision (e.g. confidence/credible interval), ideally using structured tables or plots. | 8-13 |
| Results of syntheses | 20a | For each synthesis, briefly summarise the characteristics and risk of bias among contributing studies. | 8-13 |
| 20b | Present results of all statistical syntheses conducted. If meta-analysis was done, present for each the summary estimate and its precision (e.g. confidence/credible interval) and measures of statistical heterogeneity. If comparing groups, describe the direction of the effect. | 8-13 |
| 20c | Present results of all investigations of possible causes of heterogeneity among study results. | 8-13 |
| 20d | Present results of all sensitivity analyses conducted to assess the robustness of the synthesized results. | 8-13 |
| Reporting biases | 21 | Present assessments of risk of bias due to missing results (arising from reporting biases) for each synthesis assessed. | 8-13 |
| Certainty of evidence | 22 | Present assessments of certainty (or confidence) in the body of evidence for each outcome assessed. | 8-13 |
| **DISCUSSION** | | |  |
| Discussion | 23a | Provide a general interpretation of the results in the context of other evidence. | 13-18 |
| 23b | Discuss any limitations of the evidence included in the review. | 18-19 |
| 23c | Discuss any limitations of the review processes used. | 18-19 |
| 23d | Discuss implications of the results for practice, policy, and future research. | 18-19 |
| **OTHER INFORMATION** | | |  |
| Registration and protocol | 24a | Provide registration information for the review, including register name and registration number, or state that the review was not registered. | N |
| 24b | Indicate where the review protocol can be accessed, or state that a protocol was not prepared. | 3 |
| 24c | Describe and explain any amendments to information provided at registration or in the protocol. | N |
| Support | 25 | Describe sources of financial or non-financial support for the review, and the role of the funders or sponsors in the review. | 20 |
| Competing interests | 26 | Declare any competing interests of review authors. | 20 |
| Availability of data, code and other materials | 27 | Report which of the following are publicly available and where they can be found: template data collection forms; data extracted from included studies; data used for all analyses; analytic code; any other materials used in the review. | Supplemental Material |

1.PRISMA Checklist From: Moher D, Liberati A, Tetzlaff J, Altman DG, The PRISMA Group (2009). Preferred Reporting Items for Systematic Reviews and Meta-Analyses: The PRISMA Statement. PLoS Med 6(6): e1000097. doi:10.1371/journal.pmed1000097

**Table S2: Systematic Review Protocol for Animal Intervention Studies.**

| 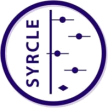  **Systematic Review Protocol for Animal Intervention Studies**  **Format by SYRCLE (**[www.syrcle.nl](http://www.syrcle.nl)**)**  **Version 2.0 (December 2014)** | | | | |
| --- | --- | --- | --- | --- |
| **Item #** | **Section/Subsection/Item** | **Description** | | **Check for approval** |
|  | A. General | | | |
| 1. | Title of the review | Understanding the Relationship between Vascular Smooth Muscle Cell Function and the Efficacy of Acupuncture in Treating Cerebral Ischemic Stroke: A Preclinical Meta-Analysis and Systematic Review | | X |
| 2. | Authors (names, affiliations, contributions) | Jiangpeng Cao1, 2, 3, Yuanhao Du1,3, Lanyu Jia4, Xiumei Yin1, 2, 3, Lihong Yang1,3, Linling Chen5, Jiang Tao1,3, Man Zhang2, Tian Qiu1, 2, 3  1National Clinical Research Center for Chinese Medicine Acupuncture and Moxibustion, Tianjin, China; 2Graduate School, Tianjin University of Traditional Chinese Medicine, Tianjin, China; 3First Teaching Hospital of Tianjin University of Traditional Chinese Medicine, Tianjin, China; 4Tianjin Academy of Traditional Chinese Medicine Affiliated Hospital, Tianjin, China; 5Huzhou Central Hospital, Zhejiang, China | | X |
| 3. | Other contributors (names, affiliations, contributions) | None | | X |
| 4. | Contact person + e-mail address | Jiangpeng Cao: 15077904232@163.com | | X |
| 5. | Funding sources/sponsors | National Natural Foundation of China (NO. 82074543; 82105007) | | X |
| 6. | Conflicts of interest | No conflicts of interests | | X |
| 7. | Date and location of protocol registration | - | |  |
| 8. | Registration number (if applicable) | - | |  |
| 9. | Stage of review at time of registration | - | |  |
|  | B. Objectives | | | |
|  | Background | | | |
| 10. | What is already known about this disease/model/intervention? Why is it important to do this review? | The protective effect of acupuncture in the treatment of cerebral ischemic stroke (CIS) have been proven both on the clinical and animal researches. How to revival the blood flow of the cerebral ischemic region is the key point on the clinical rescue for the cerebral ischemic. Meridian system, the core theory of acupuncture, is consists of the material like vessels, neural and tissues etc. the wide exploration of neural effect of acupuncture is high eyebrows, while the vessel function decided by acupuncture is rare concentrated. To explore the vascular smooth muscle cell (VSMC) function in rat model with cerebral ischemic, we designed this review. | | X |
|  | Research question | | | |
| 11. | Specify the disease/health problem of interest | VSMC function related with cerebral ischemic | | X |
| 12. | Specify the population/species studied | Rats | | X |
| 13. | Specify the intervention/exposure | Acupuncture/Electroacupuncture | | X |
| 14. | Specify the control population | Model group | | X |
| 15. | Specify the outcome measures | Neurological deficiency、region cerebral blood flow (rCBF)、VSMC function | | X |
| 16. | State your research question (based on items 11-15) | What is the effect of VSMC function on the treatment of acupuncture for CIS? | | X |
|  | C. Methods | | | |
|  | Search and study identification | | | |
| 17. | Identify literature databases to search (*e.g.,* PubMed, Embase, Web of science) | RMEDLINE via PubMed RWeb of Science  RSCOPUS REMBASE  □Other, namely:  □Specific journal(s), namely: | | X |
| 18. | Define electronic search strategies (*e.g.* use the step by step search guide15 and animal search filters20,21) | When available, please add a supplementary file containing your search strategy: [insert file name]  Supplementary file containing search strategy:  "Search strategy CIS rats.doc"  (available at request of contact person) | | X |
| 19. | Identify other sources for study identification | RReference lists of included studies □Books  RReference lists of relevant reviews  □Conference proceedings, namely:  □Contacting authors/ organisations, namely:  □Other, namely: | | X |
| 20. | Define search strategy for these other sources | Screening the reference lists for relevant titles and  screening the abstracts of these relevant titles | | X |
|  | Study selection | | | |
| 21. | Define screening phases (*e.g.,* pre-screening based on title/abstract, full text screening, both) | 1) screening based on title and abstract  2) full-text screening of the eligible articles | | X |
| 22. | Specify (a) the number of reviewers per screening phase and (b) how discrepancies will be resolved | Each phase: 2 independent observers per article. Two observers will screen all articles (Cao JP and Yin XM), Zhang M and Chen LL will each screen half of the articles. Differences will be solved through discussion or by consulting a fourth investigator (Du YH). | | X |
|  | *Define all inclusion and exclusion criteria based on:* | | | |
| 23. | Type of study (design) | Inclusion criteria: Randomized controlled trials evaluating the vascular smooth muscle function to rats with permanent CIS model.  Exclusion criteria: Not a permanent CIS model. | | X |
| 24. | Type of animals/population (*e.g.,* age, gender, disease model) | Inclusion criteria: CIS model which included rats or mice of all genders and ages  Exclusion criteria: knock-out animals, *ex vivo, in vitro* | | X |
| 25. | Type of intervention (*e.g.,* dosage, timing, frequency) | Inclusion criteria: acupuncture or electroacupuncture  Exclusion criteria: combined with other methods, *e.g., medicines* or rehabilitation training | | X |
| 26. | Outcome measures | Inclusion criteria: neurological deficiency, rCBF, VSMC relevant outcome  Exclusion criteria: no relevant outcome measure | | X |
| 27. | Language restrictions | Inclusion criteria: all languages  Exclusion criteria: none | | X |
| 28. | Publication date restrictions | Inclusion criteria: all publication dates  Exclusion criteria: none | | X |
| 29. | Other | NA | |  |
| 30. | Sort and prioritize your exclusion criteria per selection phase | Selection phase tiab screening:  1.Review  2.Human research  3.Not *in vivo* (*e.g., ex vivo*/*in vitro*)  4.Without relevant outcome  5.No model group  Additionalcriteria for full text screening:  11.Not a permanent CIS model  12.No relevant outcome measure | | X |
|  | Study characteristics to be extracted (for assessment of external validity, reporting quality) | | | |
| 31. | Study ID (*e.g.,* authors, year) | Authors, year | | X |
| 32. | Study design characteristics (*e.g.,* experimental groups, number of animals) | Number of animals in experimental and control groups | | X |
| 33. | Animal model characteristics (*e.g.,* species, gender, disease induction) | Animal age, weight, gender | | X |
| 34. | Intervention characteristics (*e.g.,* intervention, timing, duration) | Type of model, model evaluation, acupoints | | X |
| 35. | Outcome measures | Neurological deficiency scale, brain tissues’ detection, laser-Doppler for the assessment of rCBF | | X |
| 36. | Other (*e.g.,* drop-outs) | Number of excluded animals, reason of exclusion | | X |
|  | Assessment risk of bias (internal validity) or study quality | | | |
| 37. | Specify (a) the number of reviewers assessing the risk of bias/study quality in each study and (b) how discrepancies will be resolved | a) 4 reviewers. The criteria will be independently assessed by Cao JP, Yin XM, Zhang M and Chen LL by using collectively predefined assessment criteria. b) discrepancies which cannot be solved by discussion will be resolved by invoking a fourth investigator (Du YH) | | X |
| 38. | Define criteria to assess (a) the internal validity of included studies (*e.g.,* selection, performance, detection and attrition bias) and/or (b) other study quality measures (*e.g.,* reporting quality, power) | □By use of SYRCLE's Risk of Bias tool4  RBy use of SYRCLE’s Risk of Bias tool, adapted as follows:  Because of poor reporting of essential details in animal  studies, we will also include one reporting item: was it  stated that the experiment was randomized at any level?  □By use of CAMARADES' study quality checklist, e.g 22  □By use of CAMARADES' study quality checklist, adapted as follows:  □Other criteria, namely: | | X |
|  | Collection of outcome data | | | |
| 39. | For each outcome measure, define the type of data to be extracted (*e.g.,* continuous/dichotomous, unit of measurement) | Brain tissues: continuous  rCBF: continuous  Neurological deficiency: continuous | | X |
| 40. | Methods for data extraction/retrieval (*e.g.,* first extraction from graphs using a digital screen ruler, then contacting authors) | Extraction from text and tables.  Contacting authors by e-mail.  Extraction from graphs using Web Plot Digitizer (Version 4.1; E, USA) software by two independent reviewers (Cao JP and Zhang M). | | X |
| 41. | Specify (a) the number of reviewers extracting data and (b) how discrepancies will be resolved | a) Two reviewers (Cao JP and Chen LL) will extract the data independently.  b) Discrepancies will be resolved by discussion. | | X |
|  | Data analysis/synthesis | | | |
| 42. | Specify (per outcome measure) how you are planning to combine/compare the data (*e.g.,* descriptive summary, meta-analysis) | Meta-analysis with subgroup analysis for all outcome measures | | X |
| 43. | Specify (per outcome measure) how it will be decided whether a meta-analysis will be performed | A minimum of 5 articles per outcome measure is required.  No restrictions in terms of heterogeneity will be applied,  instead, sources of heterogeneity will be investigated  through subgroup analysis. | | X |
|  | *If a meta-analysis seems feasible/sensible, specify (for each outcome measure):* | | | |
| 44. | The effect measure to be used (*e.g.,* mean difference, standardized mean difference, risk ratio, odds ratio) | Brain tissues: standardized mean difference  rCBF: standardized mean difference  Neurological deficiency: standardized mean difference | | X |
| 45. | The statistical model of analysis (*e.g.,* random or fixed effects model) | Random effects model | | X |
| 46. | The statistical methods to assess heterogeneity (*e.g.,* I2, Q) | I2 | | X |
| 47. | Which study characteristics will be examined as potential source of heterogeneity (subgroup analysis) | Animal species (mouse vs. rat vs. pig etc.)  Gender (male vs. female vs. mixed)  Animal weight type (below medium vs above medium)  Type of electroacupuncture waveforms used (Distant-dense wave vs continuous wave) | | X |
| 48. | Any sensitivity analyses you propose to perform | The detection methods of brain tissues | | X |
| 49. | Other details meta-analysis (*e.g.,* correction for multiple testing, correction for multiple use of control group) | We will choose the data of last time if studies report data for a series of time points. We will synthetic different subgroup of acupuncture in a study. | | X |
| 50. | The method for assessment of publication bias | Egger’s test and funnel plots | | X |
|  | | | | |
| Final approval by (names, affiliations): | | Jiangpeng Cao1,2 †, Yuanhao Du1,3*, Lanyu Jia4, Xiumei Yin1,2, Lihong Yang1, Linling Chen5, Jiang Tao1, Man Zhang3, Tian Qiu1,2  1Department of acupuncture and moxibustion, First Teaching Hospital of Tianjin University of Traditional Chinese Medicine, Tianjin, People’s Republic of China; National Clinical Research Center for Chinese Medicine Acupuncture and Moxibustion, Tianjin, People’s Republic of China; 2Graduate School, Tianjin University of Traditional Chinese Medicine, Tianjin, People’s Republic of China; 3School of acupuncture & moxibustion and tuina, Tianjin University of Traditional Chinese Medicine, Tianjin, People’s Republic of China; 4Department of geriatric medicine, Tianjin Academy of Traditional Chinese Medicine Affiliated Hospital, Tianjin, People’s Republic of China; 5Department of traditional Chinese medicine, Huzhou Central Hospital, Huzhou, Zhejiang, People’s Republic of China | Date: 4-12-2022 | |

**Table S3: Search Strategy in PubMed**

| Steps | Search |
| --- | --- |
| #1 | “cerebral ischemic”[MeSH] OR “ischemic stroke”[Ti/Ab] OR “brain infarction”[Ti/Ab] OR “apoplexy”[Ti/Ab] OR “brain ischemia”[Ti/Ab] OR “cerebrovascular accident”[Ti/Ab] Filters: from inception until December 6, 2022 |
| #2 | “acupuncture”[MeSH] OR “acupuncture therapy”[Ti/Ab] OR “electroacupuncture”[Ti/Ab] OR “acupoints”[Ti/Ab] Filters: from inception until December 6, 2022 |
| #3 | “rat”[MeSH] OR “mice”[MeSH] OR “animal study”[Ti/Ab] OR “mechanism”[Ti/Ab] OR “preclinical study”[Ti/Ab] Filters: from inception until December 6, 2022 |
| #4 | “vasodilatation”[Ti/Ab] OR “vascular function”[Ti/Ab] Filters: from inception until December 6, 2022 |
| #5 | #1 AND #2 AND #3 AND #4 |

| **Table S4: Characteristics of included studies** | | | | | | | | | | | |
| --- | --- | --- | --- | --- | --- | --- | --- | --- | --- | --- | --- |
| **Study(years)** | **Species (sex)** | **Age** | **Weight (g）** | **Model method** | **Model reference** | **Model assessment** | **Neurological deficiency** | **CIV** | **rCBF** | **Region assessed** | **Outcome extracted** |
| Sun et al,12 2008 | Wistar (M) | —— | 180-210 | MCAO | Longa EZ | —— | —— | —— | —— | IBA | IP3, DAG |
| Zhang et al,13 2009 | Wistar (M & F) | —— | 200±20 | MCAO | Chen ST | Horner sign (+) | —— | TTC | —— | IBT | VEGF |
| Du et al,14 2011 | Wistar (M) | —— | 180-200 | MCAO | Longa EZ | rCBF | mNSS | —— | LDF | IBA | EC |
| Pan et al,15 2012 | SD (M) | 3-4 months | 220-250 | MCAO | Longa EZ | Zea Longa scores | —— | —— | —— | IBT | VEGF, MVD |
| Zhang et al,16 2012 | SD (M) | Adult | 200±20 | BCCAO | de la Torre | —— | —— | —— | —— | IBT | BDNF, VEGF |
| Xu et al,17 2012 | Wistar (M) | —— | —— | MCAO | Longa EZ | rCBF | —— | —— | —— | IBA | PKC |
| Lu et al,18 2013 | Wistar (M) | 12 weeks | 200±20 | MCAO | Longa EZ | Zea Longa scores | Longa scores | —— | LDF | Serum | Insulin |
| Lu et al,19 2014 | Wistar (M) | —— | 220±20 | MCAO | Longa EZ | Zea Longa scores | Longa scores | —— | LDF | IBA | CYP2C11 |
| Lv et al,20 2015 | Wistar (M) | —— | 180-200 | MCAO | Longa EZ | Zausinger scores | —— | —— | —— | IBA | PKC |
| Zheng et al,21 2016 | Wistar (M) | 8 weeks | 250-300 | MCAO | Longa EZ | —— | mNSS | —— | LDF | IBT | miRNA |
| Liu et al,22 2016 | SD (M) | —— | 200±20 | MCAO | Longa EZ | —— | —— | —— | —— | IBT | BDNF, VEGF |
| Yang et al,23 2017 | Wistar (M) | —— | 180-200 | MCAO | Longa EZ | mNSS | —— | —— | —— | IBA | Apelin, APJ |
| Zan et al,24 2019 | SD (M) | —— | 300±20 | MCAO | Longa EZ | Zea Longa scores | —— | TTC | LDF | IBT | VEGF, VEGFR2, bFGF, CD34+ |
| Xu et al,25 2020 | Wistar (M) | —— | 180-220 | MCAO | Longa EZ | rCBF | —— | —— | —— | IBA | sGC, PKG, cGMP |
| Li et al,26 2021 | SD (M) | Adult | 250-280 | MCAO | Zongyu Xiao | Zea Longa scores | Longa scores | MRI | —— | IBT | VEGF, GFAP, NeuN, β-catenin, Axin2 |
| Li et al,27 2022b | SD (M) | —— | 280-320 | MCAO | Longa EZ | mNSS | mNSS | —— | LDF | IBT | VEGF, BDNF, MVD |
| Li et al,28 2022a | Wistar (M) | 5-6 weeks | 180-200 | MCAO | Longa EZ | mNSS | mNSS | —— | Laser confocal microscope | IBT; IBA | Gq, CaM, IP3, DAG, [Ca2+]i |
| Li et al,29 2023 | Wistar (M) | —— | 180-200 | MCAO | —— | rCBF | —— | —— | —— | IBA | MLCK, MLC-P, MYPT1, PP1c-δ, M20, myosin-ATPase activity |
| M: Male; F: Female; SD: Sprague-Dawley; MCAO: Middle cerebral artery occlusion; BCCAO: Bilateral common carotid artery occlusion; rCBF: Regional cerebral blood flow; mNSS: Modified neurological severity score; CIV: Cerebral infarct volume; TTC: 2,3,5-Triphenyltetrazolium Chloride; MRI: magnetic resonance imaging; LDF: Laser doppler flowmetry; IBA: Ischemic brain arteries; IBT: Ischemic brain tissues; IP3: Inositol triphosphate; DAG:Diacylglycerol; VEGF: Vascular endothlial growth factor; EC: Endothelial cell; MVD: Micro-vessel density; BDNF: Brain-derived neurotrophic factor; PKC: Protein kinase C; VEGFR2: Vascular endothelial growth factor receptor 2; bFGF: Basic fibroblast growth factor; sGC: Soluble guanylate cyclase; cGMP: Cyclic guanosine monophosphate; PKG: Protein kinase G; GFAP: Glial fibrillary acidic protein; NeuN: Neuronal nucleus antigen; Gq: G-protein subtype; CaM: Calmodulin; MLCK: Myosin light chain kinase; MLC-P: Myosin light chain phosphorylation; MYPT1, PP1c-δ, M20: Subunits of myosin light chain phosphatase. | | | | | | | | | | | |

| **Table S5: Acupuncture information of included studies** | | | | | | | | |
| --- | --- | --- | --- | --- | --- | --- | --- | --- |
| **Study (years)** | **Interventions**  **(animal numbers)** | | **Acupoints** | **EA parameters** | | | **Time**  **(min)** | **Course**  **total times** |
| **Frequency** | **Intensity** | **Waveform** |
| Sun et al,12 2008 | EA (8) | Model (8) | DU26 | 15Hz | 0.1mA | continuous wave | 20 | 6h, 1 time |
| Zhang et al,13 2009 | MA (8) | Model (8) | DU14, RN6, DU4 | —— | —— | —— | 60 | 24h, 3 times |
| Du et al,14 2011 | EA (15) | Model (15) | DU26 | 15Hz | 0.1mA | continuous wave | 20 | 12d, 12 times |
| Pan et al,15 2012 | EA (20) | Model (10) | LI11, LI4; PC3, PC6 | 20Hz | 2-4V | continuous wave | 30 | 72h, 4 times |
| Zhang et al,16 2012 | EA (10) | Model (10) | DU20, DU14 | 2Hz | 3V | continuous wave | 30 | 35d, 35 times |
| Xu et al,17 2012 | EA (6) | Model (6) | DU26 | 15Hz | 1mA | continuous wave | 20 | 6h, 1 time |
| Lu et al,18 2013 | EA (8) | Model (8) | LI11, PC6 | 2/15Hz | 1mA | distant-dense wave | 30 | 14d, 14 times |
| Lu et al,19 2014 | EA (8) | Model (8) | LI11, PC6 | 2/15Hz | 1mA | distant-dense wave | 20 | 7d, 7 times |
| Lv et al,202015 | EA (6) | Model (6) | DU26 | 15Hz | 1mA | continuous wave | 20 | 12h, 1 time |
| Zheng et al,21 2016 | EA (5) | Model (5) | DU26, PC6 | 2Hz | 3mA | continuous wave | 1 | 21d, 42 times |
| Liu et al,22 2016 | EA (8) | Model (8) | GV20, ST36 | 2Hz | 2V | continuous wave | 30 | 14d, 14 times |
| Yang et al,23 2017 | EA (10) | Model (10) | DU26 | 15Hz | 2mA | continuous wave | 20 | 12d, 12 times |
| Zan et al,24 2019 | EA (9) | Model (9) | DU20, DU26, PC6 | 2/20Hz | 3-5V | distant-dense wave | 20 | 14d, 14 times |
| Xu et al,25 2020 | EA (10) | Model (10) | DU26 | 15Hz | 2mA | continuous wave | 20 | 24h, 1 time |
| Li et al,26 2021 | EA (6) | Model (6) | DU20, DU26, PC6, SP6 | 2/100Hz | 2-4V | distant-dense wave | 30 | 21d, 18 times |
| Li et al,27 2022b | EA (18) | Model (9) | DU26, LI11, LI4, ST36;  DU16, DU20, BL15, PC6 | 4/20Hz | 0.5mA | distant-dense wave | 20 | 14d, 14 times |
| Li et al,28 2022a | EA (6) | Model (6) | DU26 | 15Hz | 1mA | continuous wave | 20 | 6h, 1 time |
| Li et al,29 2023 | EA (6) | Model (6) | DU26 | 15Hz | 1mA | continuous wave | 20 | 6h, 1 time |
| EA: Electroacupuncture; MA: Manual acupuncture; DU26 (Shuigou); DU14 (Dazhui); RN6 (Qihai); DU4 (Mingmen); LI11 (Quchi); LI4 (Hegu); PC3 (Quze); PC6 (Neiguan); DU20 (Baihui); ST36 (Zusanli); SP6 (Sanyinjiao); DU16 (Fengfu); BL15 (Xinshu); h: hour; d: day. | | | | | | | | |

| **Table S6: Risk of bias in included studies accessed by SYRCLE’s RoB tool** | | | | | | | | | | | | | | |
| --- | --- | --- | --- | --- | --- | --- | --- | --- | --- | --- | --- | --- | --- | --- |
| **Study (years)** | **Risk of bias for each item∗ assessed** | | | | | | | | | | | | | |
| **Selection bias** | | | **Performance bias** | | **Detection bias** | | **Attrition**  **bias** | **Reporting**  **bias** | **Other biases** | | | | |
| 1 | 2 | 3 | 4 | 5 | 6 | 7 | 8 | 9 | 10 | 11 | 12 | 13 | 14 |
| Sun et al,12 2008 | Unclear | Yes | Unclear | Unclear | Unclear | Unclear | Unclear | Unclear | Yes | Yes | Unclear | Yes | Yes | Unclear |
| Zhang et al,13 2009 | Unclear | Yes | Unclear | Unclear | Unclear | Unclear | Unclear | Unclear | Yes | Yes | Unclear | Yes | Yes | Unclear |
| Du et al,14 2011 | Unclear | Yes | Unclear | Unclear | Unclear | Unclear | Unclear | Unclear | Yes | Yes | Unclear | Yes | Yes | Unclear |
| Pan et al,15 2012 | Unclear | Yes | Unclear | Yes | Unclear | Unclear | Unclear | Unclear | Yes | Yes | Unclear | Yes | Yes | Unclear |
| Zhang et al,16 2012 | Yes | Yes | Unclear | Unclear | Unclear | Unclear | Unclear | Unclear | Yes | Yes | Unclear | Yes | Yes | Unclear |
| Xu et al,17 2012 | Unclear | Yes | Unclear | Unclear | Unclear | Unclear | Unclear | Unclear | Yes | Yes | Unclear | Yes | Yes | Unclear |
| Lu et al,18 2013 | Yes | Yes | Unclear | Unclear | Unclear | Unclear | Unclear | Unclear | Yes | Yes | Unclear | Yes | Yes | Unclear |
| Lu et al,19 2014 | Yes | Yes | Unclear | Unclear | Unclear | Unclear | Unclear | Unclear | Yes | Yes | Unclear | Yes | Yes | Unclear |
| Lv et al,202015 | Yes | Yes | Unclear | Unclear | Unclear | Unclear | Unclear | Unclear | Yes | Yes | Unclear | Yes | Yes | Unclear |
| Zheng et al,21 2016 | Unclear | Yes | Unclear | Unclear | Unclear | Unclear | Unclear | Unclear | Yes | Yes | Unclear | Yes | Yes | Unclear |
| Liu et al,22 2016 | Unclear | Yes | Unclear | Unclear | Unclear | Unclear | Unclear | Unclear | Yes | Yes | Unclear | Yes | Yes | Unclear |
| Yang et al,23 2017 | Unclear | Yes | Unclear | Yes | Unclear | Unclear | Unclear | Unclear | Yes | Yes | Unclear | Yes | Yes | Unclear |
| Zan et al,24 2019 | Unclear | Yes | Unclear | Unclear | Unclear | Unclear | Unclear | Unclear | Yes | Yes | Unclear | Yes | Yes | Unclear |
| Xu et al,25 2020 | Yes | Yes | Unclear | Unclear | Unclear | Unclear | Unclear | Unclear | Yes | Yes | Unclear | Yes | Yes | Unclear |
| Li et al,26 2021 | Yes | Yes | Unclear | Unclear | Unclear | Yes | Unclear | Unclear | Yes | Yes | Unclear | Yes | Yes | Yes |
| Li et al,27 2022b | Yes | Yes | Unclear | Unclear | Unclear | Yes | Unclear | Unclear | Yes | Yes | Unclear | Yes | Yes | Unclear |
| Li et al,28 2022a | Yes | Yes | Unclear | Unclear | Unclear | Unclear | Unclear | Unclear | Yes | Yes | Unclear | Yes | Yes | Unclear |
| Li et al,29 2023 | Yes | Yes | Unclear | Unclear | Unclear | Unclear | Unclear | Unclear | Yes | Yes | Unclear | Yes | Yes | Unclear |
| ∗1: sequence generation; 2: baseline characteristics; 3: allocation concealment; 4: random housing; 5: blinding; 6: random outcome assessment; 7: blinding; 8: incomplete outcome data; 9: selective outcome reporting; 10: free of contamination; 11: free of inappropriate influence of funders; 12: free of the unit of analysis errors; 13: design-specific risks of bias absent; 14: new animals added to replace drop-outs. | | | | | | | | | | | | | | |

| 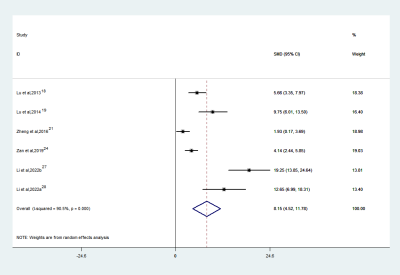  A | 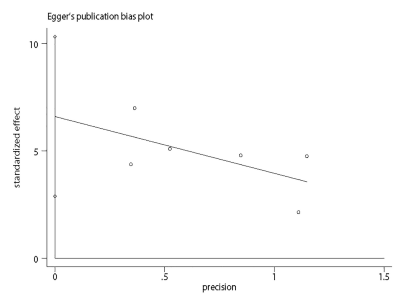  B | 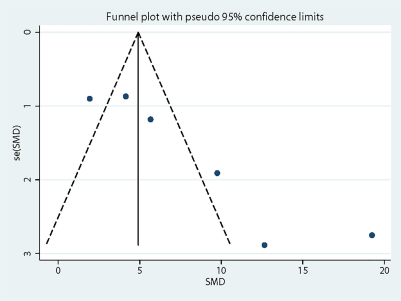  C |
| --- | --- | --- |
| **Figure S1** Forest plot and publication bias tests of studies evaluating rCBF on the treatment of acupuncture vs model group in CIS rats. (A)Forest plot of studies evaluating the rCBF on the treatment of acupuncture vs model group in CIS rats. (B) Egger’s test for evaluating the publication bias of rCBF. (C) Funnel plot for rCBF including 95% CI lines. | | |

| 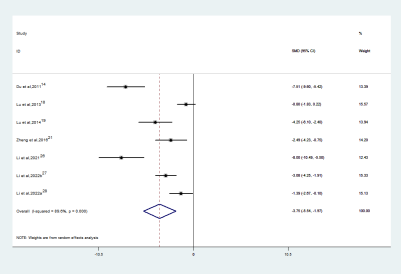  A | 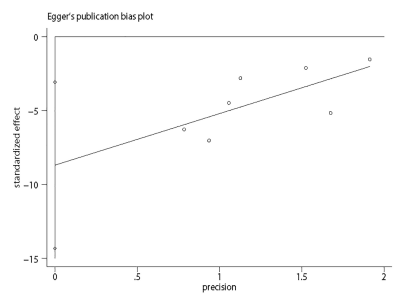  B | 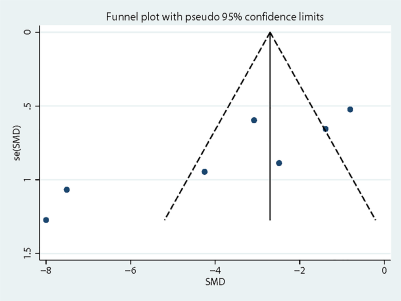  C |
| --- | --- | --- |
| **Figure S2** Forest plot and publication bias tests of studies evaluating neurological deficiency on the treatment of acupuncture vs model group in CIS rats. (A)Forest plot of studies evaluating the neurological deficiency on the treatment of acupuncture vs model group in CI rats. (B) Egger’s test for evaluating the publication bias of neurological deficiency. (C) Funnel plot for neurological deficiency including 95% CI lines. | | |

| 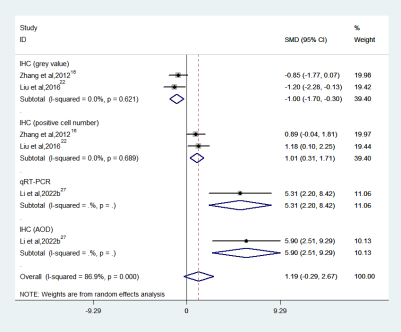  A | 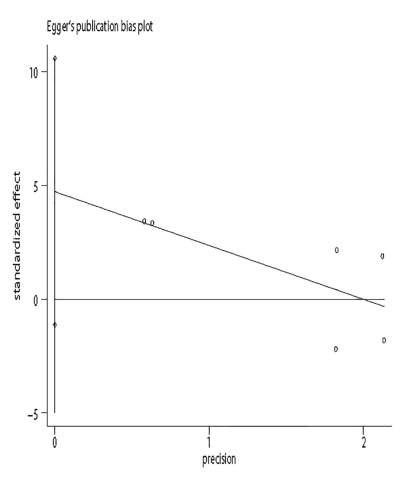  B | 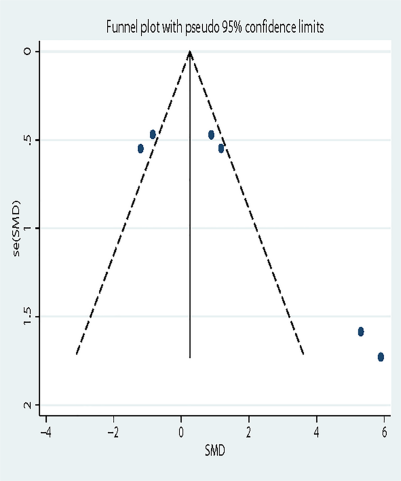  C |
| --- | --- | --- |
| **Figure S3** Forest plot and publication bias tests of studies evaluating BDNF on the treatment of acupuncture vs model group in CIS rats. (A)Forest plot of studies evaluating the BDNF on the treatment of acupuncture vs model group in CIS rats. (B) Egger’s test for evaluating the publication bias of BDNF. (C) Funnel plot for BDNF including 95% CI lines. IHC: immunohistochemistry; qRT-PCR: quantitative reverse transcription-polymerase chain reaction; AOD: average optical density. | | |

| 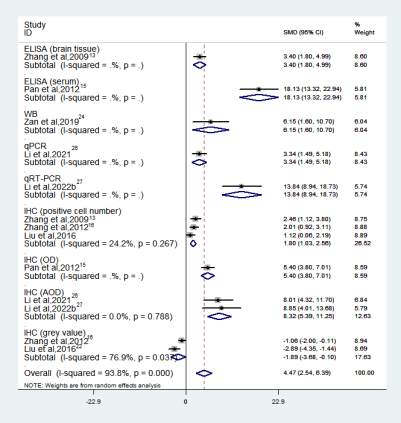  A | 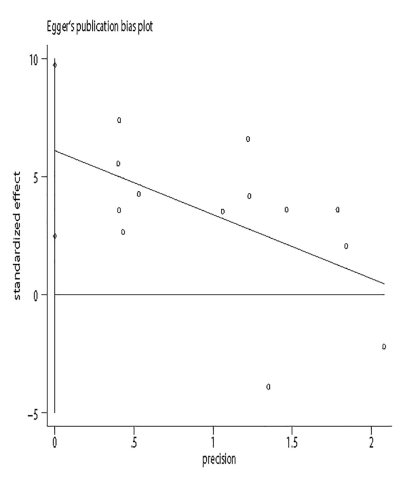  B | 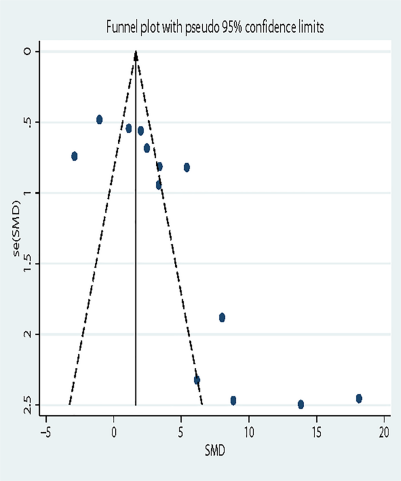  C |
| --- | --- | --- |
| **Figure S4** Forest plot and publication bias tests of studies evaluating VEGF on the treatment of acupuncture vs model group in CIS rats. (A)Forest plot of studies evaluating the VEGF on the treatment of acupuncture vs model group in CI rats. (B) Egger’s test for evaluating the publication bias of VEGF. (C) Funnel plot for VEGF including 95% CI lines. ELISA: enzyme linked immunosorbent assay; WB: western blot; qPCR: quantitative real-time PCR; qRT-PCR: quantitative reverse transcription-polymerase chain reaction; IHC: immunohistochemistry; OD: optical density; AOD: average optical density. | | |

| 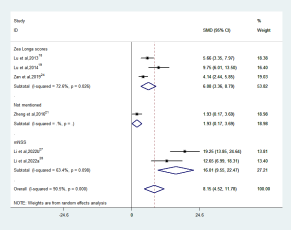  A | 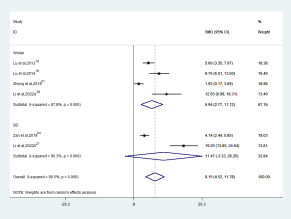  B | 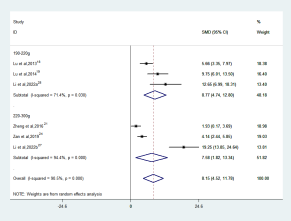  C | 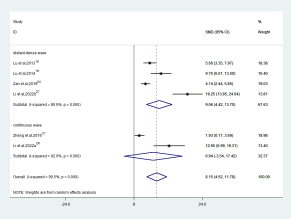  D |
| --- | --- | --- | --- |
| **Figure S5** Forest plots of studies evaluating rCBF according to difference of model references, species, weight and EA waveforms, on the treatment of acupuncture vs model group in CIS rats. (A) Forest plot of studies evaluating the rCBF on model references. (B) Forest plot of studies evaluating the rCBF on species. (C) Forest plot of studies evaluating the rCBF on weight. (D) Forest plot of studies evaluating the rCBF on EA waveforms. EA: electroacupuncture; mNSS: modified neurological severity score; SD: Sprague Dawley; g: gram. | | | |

| 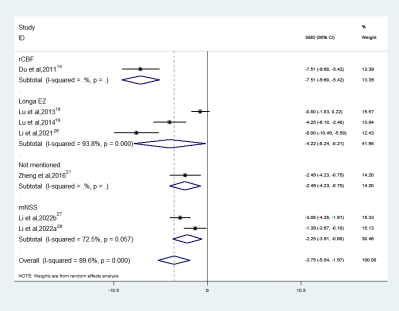  A | 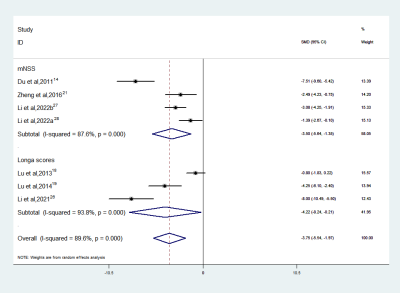  B | 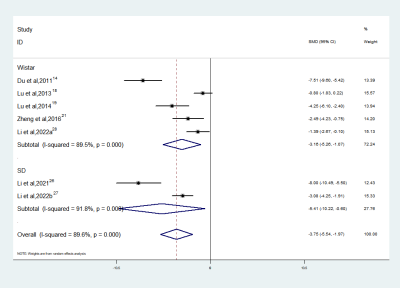  C |
| --- | --- | --- |
| 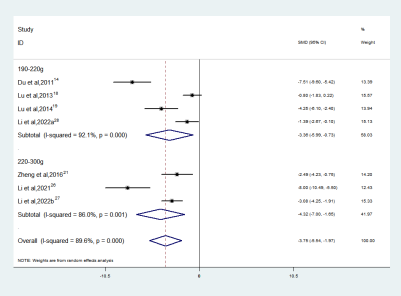  D | 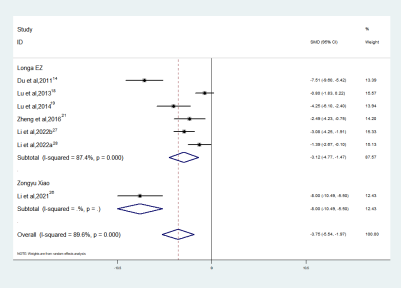  E | 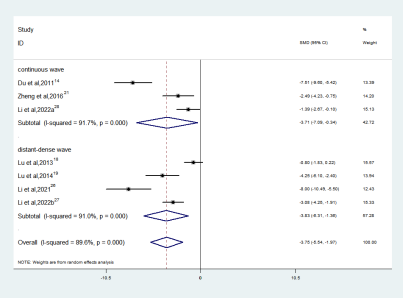  F |
| **Figure S6** Forest plots of studies evaluating neurological deficiency according to difference of model assessment, evaluation type, species, weight, model reference and EA waveforms on the treatment of acupuncture vs model group in CIS rats. (A) Forest plot of studies evaluating the neurological deficiency on model assessment. (B) Forest plot of studies evaluating the neurological deficiency on evaluation type. (C) Forest plot of studies evaluating the neurological deficiency on species. (D) Forest plot of studies evaluating the rCBF on weight. (E) Forest plot of studies evaluating the neurological deficiency on model reference (F) Forest plot of studies evaluating the neurological deficiency on EA waveforms. rCBF: region cerebral blood flow; mNSS: modified neurological severity score; SD: Sprague Dawley; g: gram. | | |
